# Supplementary material
Source: PubMed Central journal article supplement (PMC3230731)
Supplement: NIHMS308887-supplement-01.pdf [file NIHMS308887-supplement-01.pdf]

## **Appendix 1**

### **The Infant Aphakia Treatment Study Group**

#### **Administrative Units and Participating Clinical Centers**

**Clinical Coordinating Center (Emory University):** Scott R.Lambert, M.D. (Study Chair), Lindreth DuBois MEd, MMSc (National Coordinator)

**Data Coordinating Center (Emory University):** Michael Lynn MS (Director), Betsy Bridgman BS, Marianne Celano PhD, Julia Cleveland MSPH, George Cotsonis MS, Carey Drews-Botsch PhD, Nana Freret MSN, Lu Lu MS, Seegar Swanson, Thandeka Tutu-Gxashe MPH

**Visual Acuity Testing Center (University of Alabama, Birmingham):** E. Eugenie Hartmann PhD (Director), Clara Edwards, Claudio Busettoni PhD, Samuel Hayley

**Steering Committee:** Scott R Lambert MD, Edward G. Buckley MD, David A. Plager MD, M. Edward Wilson MD, Michael Lynn MS, Lindreth DuBois Med MMSc, Carolyn Drews-Botsch PhD, E. Eugenie Hartmann PhD, Donald F Everett MA

**Contact Lens Committee:** Buddy Russell COMT, Michael Ward MMSc

#### **Participating Clinical Centers (In order by the number of patients enrolled):**

**Medical University of South Carolina; Charleston, South Carolina (14):** M. Edward Wilson MD, Margaret Bozic CCRC, COA

**Harvard University; Boston, Massachusetts (14):** Deborah K. VanderVeen MD, Theresa A Mansfield RN, Kathryn Bisceglia Miller OD

**University of Minnesota; Minneapolis, Minnesota (13):** Stephen P. Christiansen MD, Erick D. Bothun MD, Ann Holleschau, Jason Jedlicka OD, Patricia Winters OD, Jacob Lang OD

**Cleveland Clinic; Cleveland, Ohio (10):** Elias I. Traboulsi MD, Susan Crowe BS, COT, Heather Hasley Cimino OD

**Baylor College of Medicine; Houston, Texas (10):** Kimberly G Yen MD, Maria Castanes MPH, Alma Sanchez COA, Shirley York

**Oregon Health and Science University; Portland, Oregon (9):** David T Wheeler MD, Ann U. Stout MD, Paula Rauch OT, CRC, Kimberly Beaudet CO, COMT, Pam Berg CO, COMT

**Emory University; Atlanta, Georgia (9):** Scott R. Lambert MD, Amy K. Hutchinson MD, Lindreth DuBois Med, MMSc, Rachel Robb MMSc, Marla J. Shainberg CO

**Duke University; Durham, North Carolina (8):** Edward G. Buckley MD, Sharon F. Freedman MD, Lois Duncan BS, B.W. Phillips, FCLSA, John T. Petrowski, OD

**Vanderbilt University; Nashville, Tennessee (8):** David Morrison MD, Sandy Owings COA, CCRP, Ron Biernacki CO, COMT, Christine Franklin COT

**Indiana University (7):** David A Plager MD, Daniel E. Neely MD, Michele Whitaker COT, Donna Bates COA, Dana Donaldson OD

**Miami Children's Hospital (6):** Stacey Kruger MD, Charlotte Tibi CO, Susan Vega

**University of Texas Southwestern; Dallas, Texas (6):** David R. Weakley MD, David R. Stager, Jr., Joost Felius PhD, Clare Dias CO, Debra L. Sager, Todd Brantley OD

**Data and Safety Monitoring Committee:** Robert Hardy PHD (Chair), Eileen Birch PhD, Ken Cheng MD, Richard Hertle MD, Craig Kollman PhD, Marshalyn Yeargin-Allsopp MD, (resigned), Cyd McDowell, Donald F. Everett MA

**Medical Safety Monitor:** Allen Beck MD
